# Supplementary material for: Optimizing Chitin Depolymerization by Lysozyme to Long-Chain Oligosaccharides
Source: Mar Drugs. 2021 May 31;19(6):320. doi: 10.3390/md19060320 (PMC8229320; doi:10.3390/md19060320)
Supplement: Supplementary file 1 [file marinedrugs-19-00320-s001.zip › marinedrugs-1245577-supplementary.pdf]

# Supporting Information

## Optimizing chitin depolymerization by lysozyme to long-chain oligosaccharides

Arnaud Masselin,<sup>1</sup> Antoine Rousseau,<sup>1</sup> Stéphanie Pradeau,<sup>1</sup> Laure Fort,<sup>2</sup> Rodolphe Gueret,<sup>2</sup>  
Laurine Buon,<sup>1</sup> Sylvie Armand,<sup>1</sup> Sylvain Cottaz,<sup>1</sup> Luc Choisnard<sup>3</sup> & Sébastien Fort<sup>1</sup>

<sup>1</sup> Univ. Grenoble Alpes, CNRS, CERMAV, 38000 Grenoble, France

<sup>2</sup> Univ. Grenoble Alpes, CNRS, DCM, 38000 Grenoble, France

<sup>3</sup> Univ. Grenoble Alpes, CNRS, DPM, 38000 Grenoble, France

### Chromatography

Analytical size exclusion chromatography was performed with two Superdex peptide 10/300GL columns in series using refractive index detection. COs mixtures (10 mg/mL) in ultrapure water were filtered on a 0.2 µm membrane before injection (10 mL). Elution was performed with 0.1 M NaCl at a flow rate of 0.4 mL/min.

### Nuclear Magnetic Resonance (NMR)

NMR spectra were recorded in D<sub>2</sub>O with a Bruker Avance III 400MHz spectrometer. The solvent residual peak of D<sub>2</sub>O at 4.25 ppm (353 K) was used as internal standard. Chemical shifts  $\delta$  are reported in ppm relative to the solvent residual peak.

### Mass spectrometry

MALDI-TOF spectrum were recorded with a Bruker Autoflex Speed using 2,5-dihydroxybenzoic acid (DHB) matrix.

### Determination of HEWL activity

Fluorescence spectra were recorded at 20 °C with a CLARIOstar microplate reader equipped with thermostated cell holder.

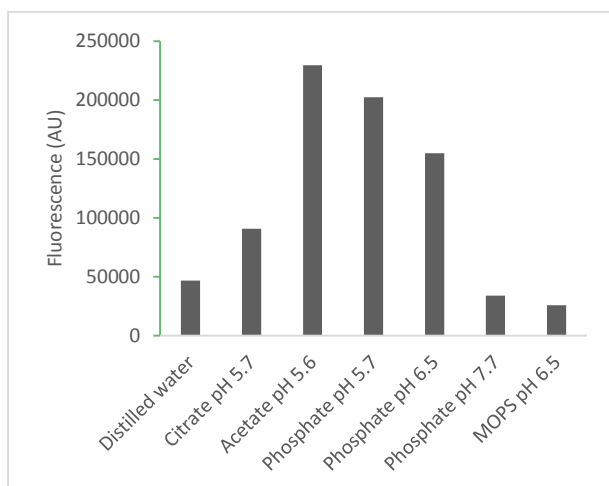

Fluorescence assay of hen egg-white lysozyme (HEWL) (0.13 mg/mL) activity on 4-Mu-CO-III (27  $\mu$ M) after 5 h at 37°C in distilled water or various buffers (60 mM)

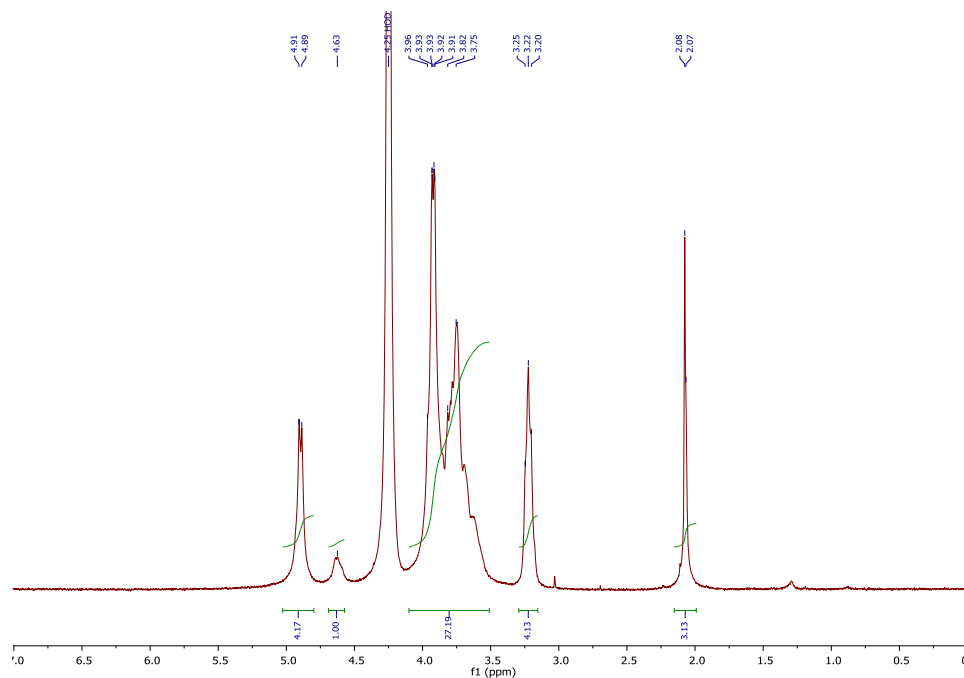

**$^1\text{H}$  NMR Chitosan (Sigma, DA 0.2) ( $\text{D}_2\text{O}$ , 353 K)**

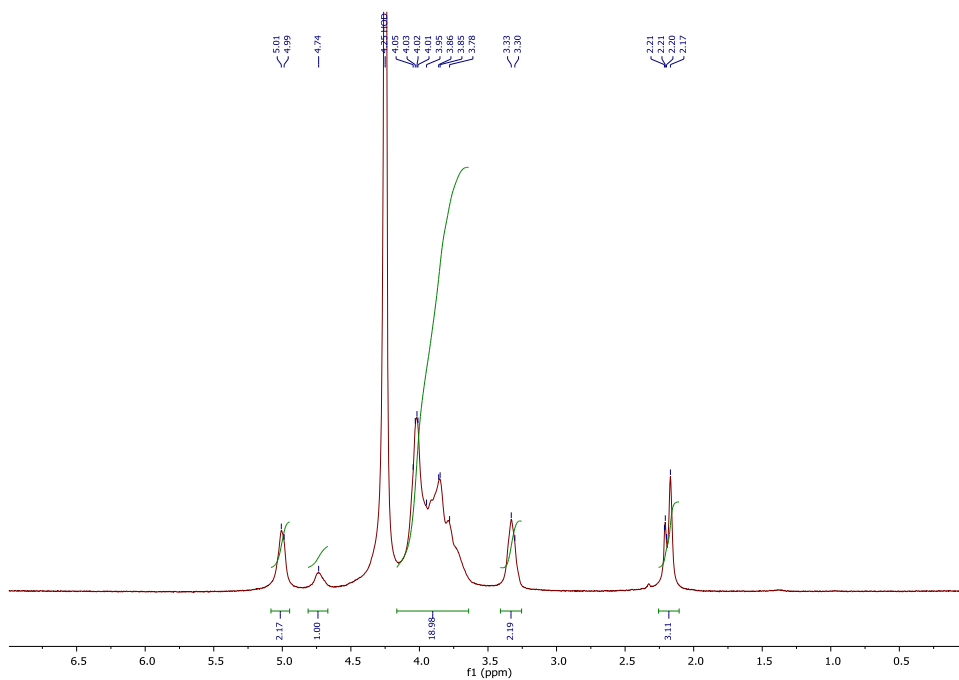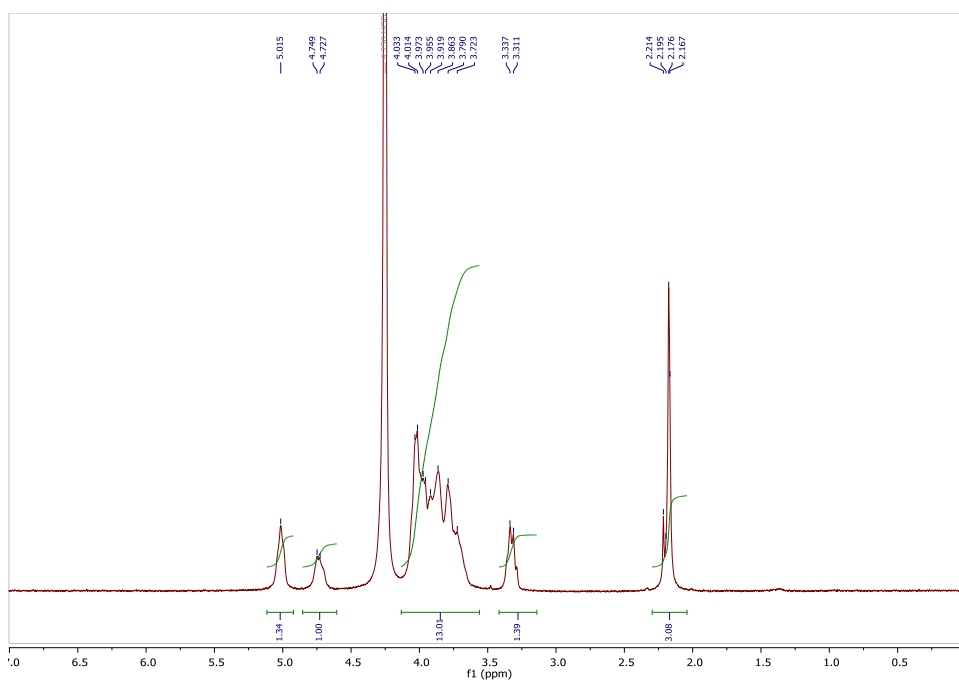

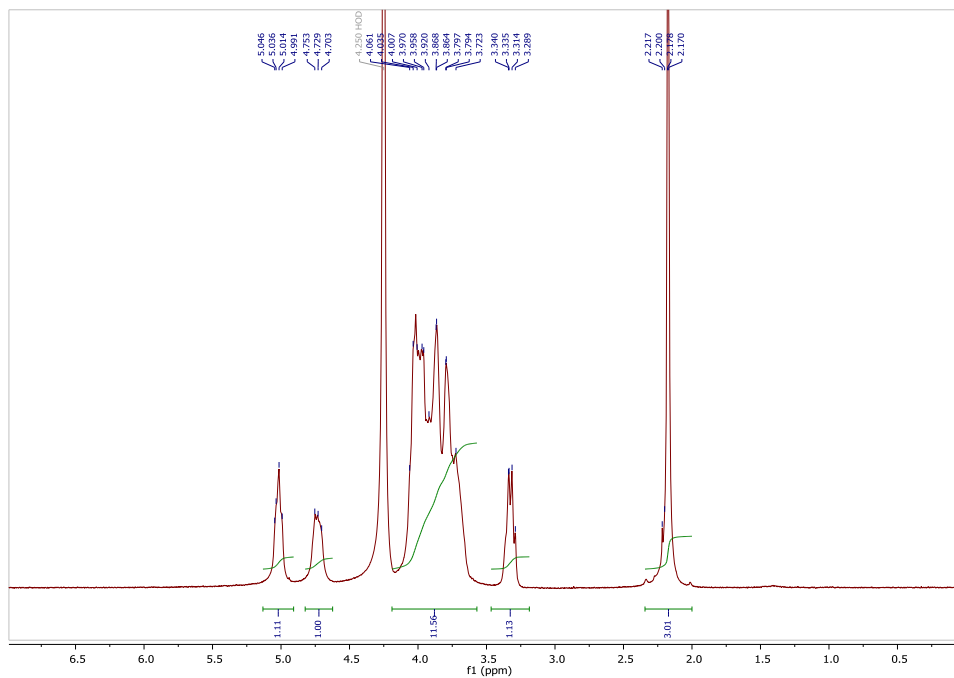

**<sup>1</sup>H NMR Chitin DA 0.47 (D<sub>2</sub>O, 353 K)**

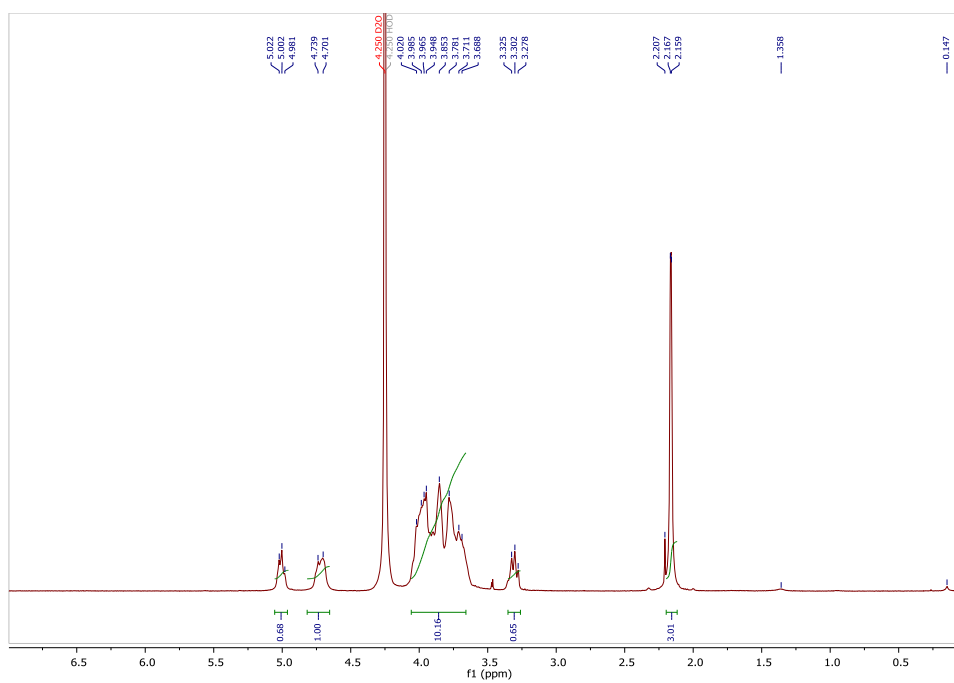

**<sup>1</sup>H NMR Chitin DA 0.59 (D<sub>2</sub>O, 353 K)**

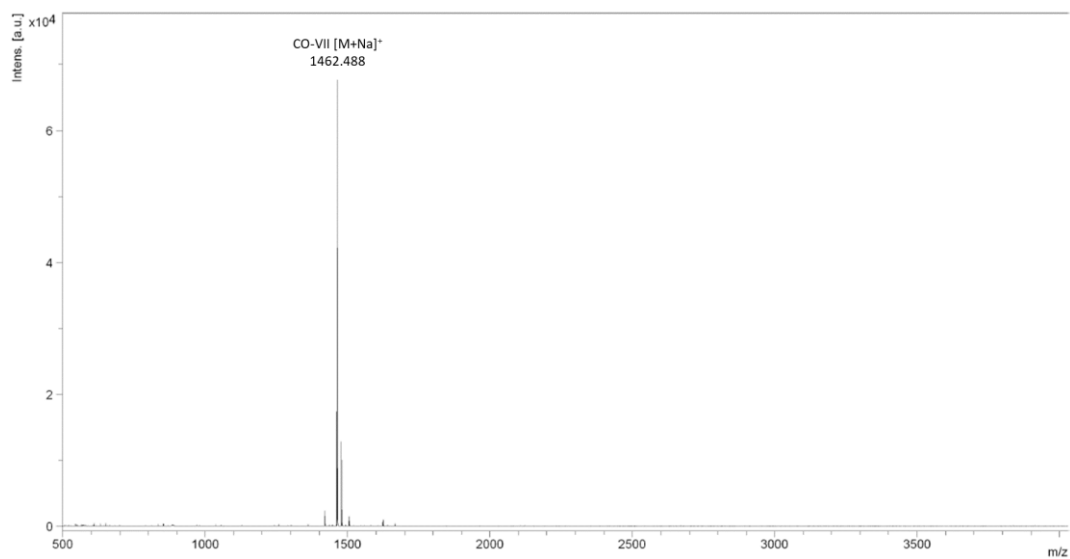

**MALDI-TOF mass spectrum of purified CO-VII (positive mode, DHB matrix)**

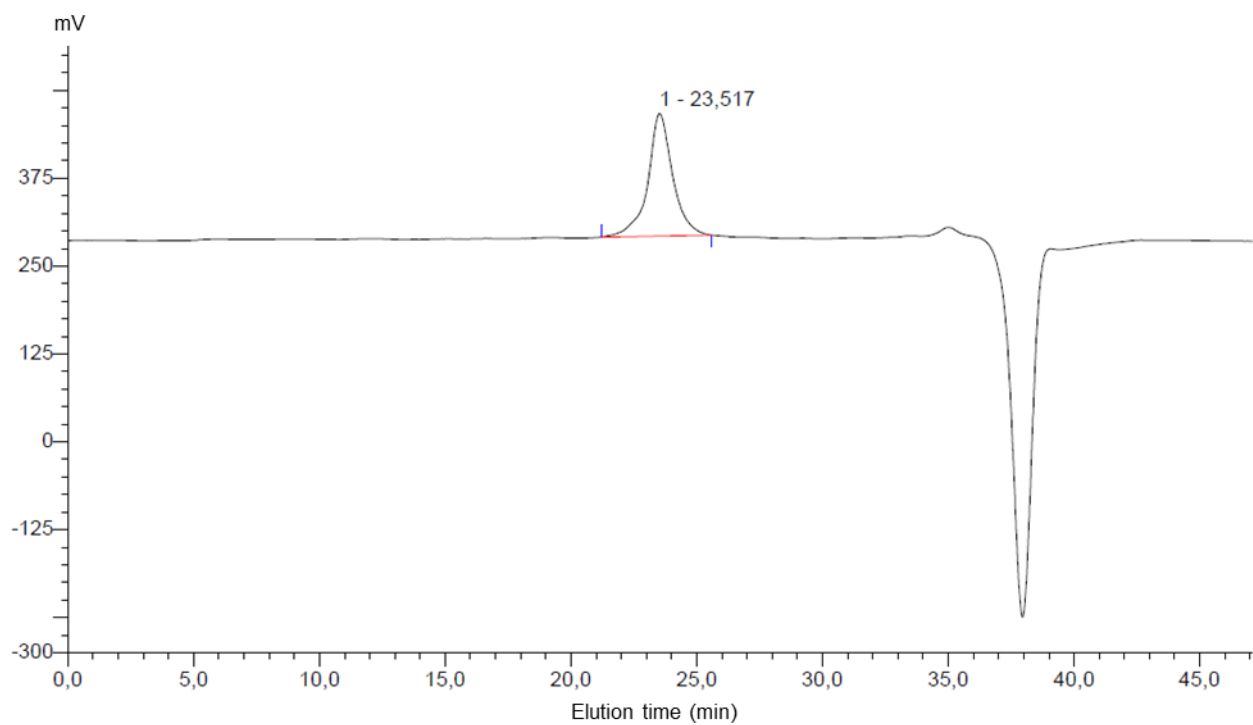

**Size-exclusion chromatography profile of purified CO-VII**

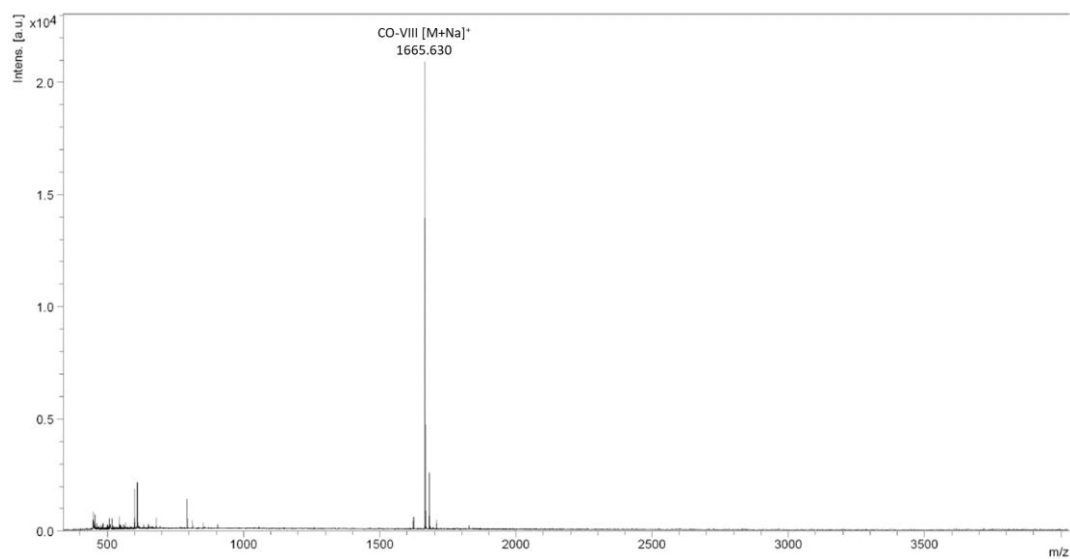

**MALDI-TOF mass spectrum of purified CO-VIII (positive mode, DHB matrix)**

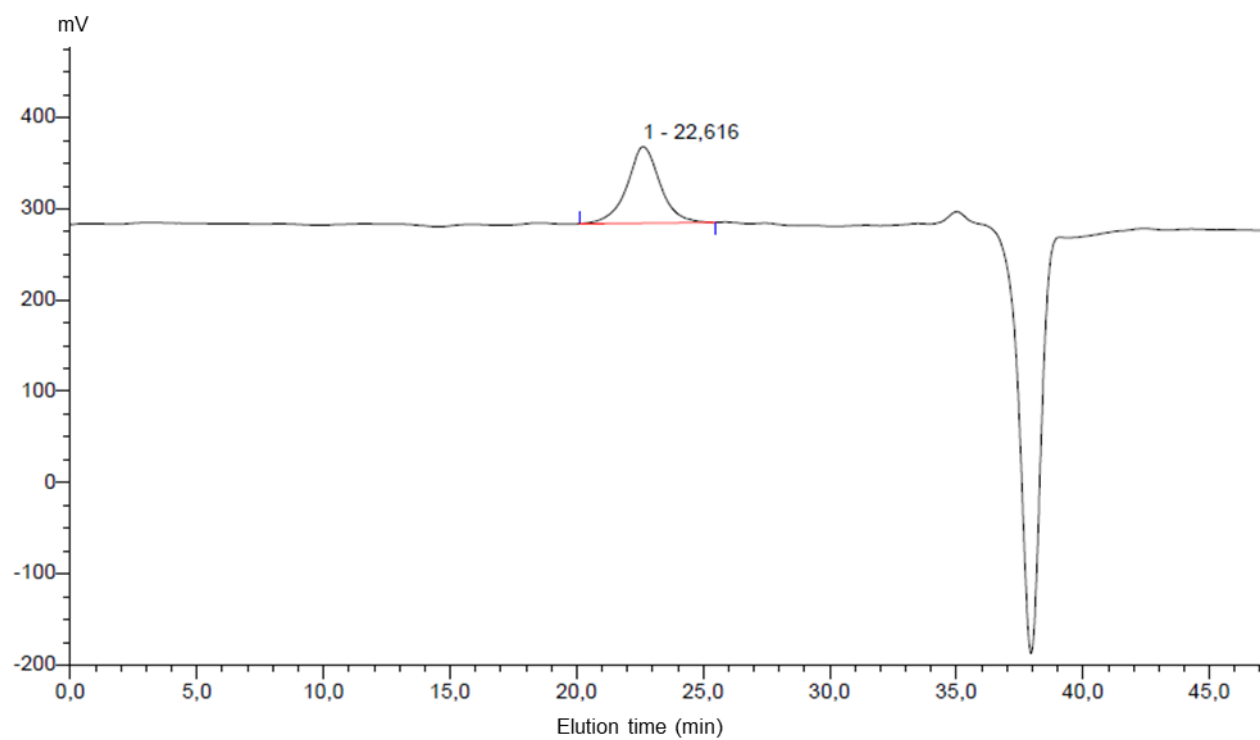

**Size-exclusion chromatography profile of purified CO-VIII**

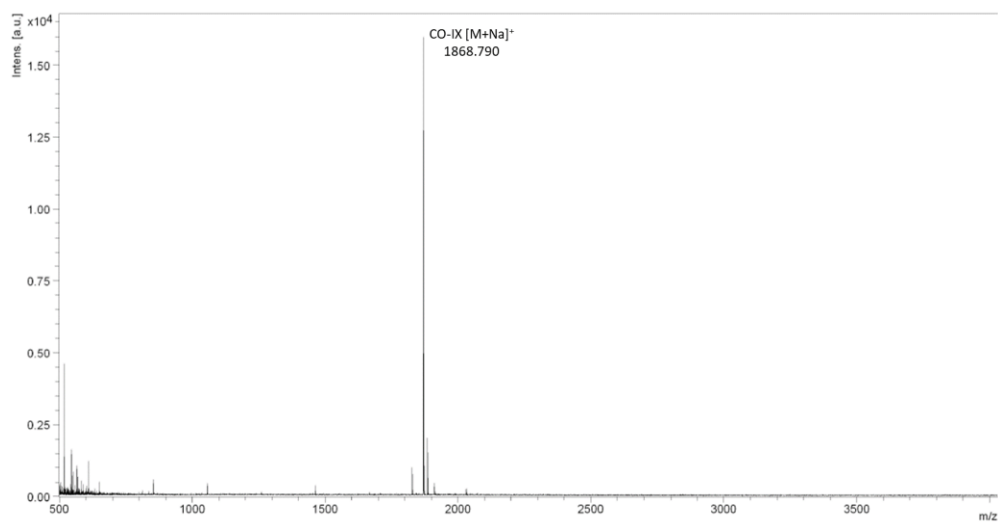

**MALDI-TOF mass spectrum of purified CO-IX (positive mode, DHB matrix)**

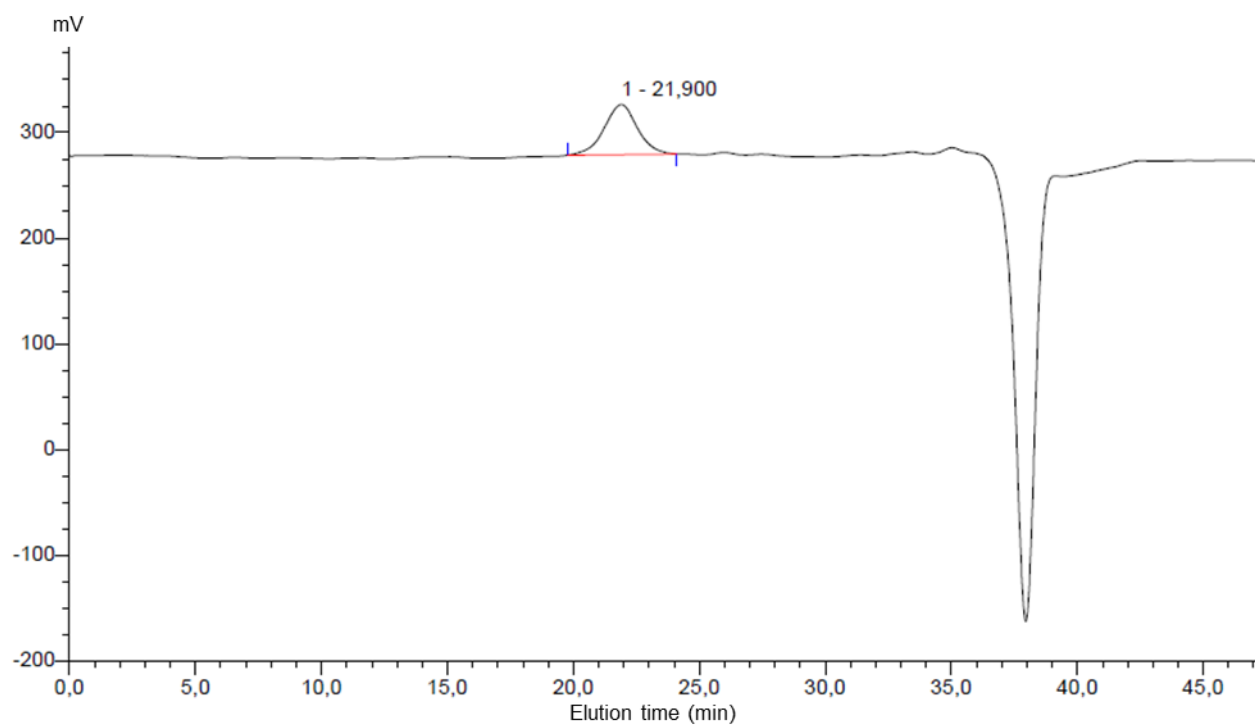

**Size-exclusion chromatography profile of purified CO-IX**
